# Supplementary material for: Superior immune reconstitution using Treg-expanded donor cells versus PTCy treatment in preclinical HSCT models
Source: JCI journal article supplement (doi:10.1172/jci.insight.121717), 2018-10-17

## Supplemental Figure legends

**Supplemental Figure 1.: Levels of donor Treg expansion.** Donor mice were injected i.p. with TL1A-Ig (50 µg) on days 1-4; rIL-2 (1.5 µg) bound to the α-IL-2 mAb (JES6-5H4; 8ug) on days 4 and 6. Treg expansion levels are shown for B6-FoxP3<sup>rfp</sup> mice (major model; **A**) (n = 6) and B10.D2 mice (minor model; **B**) (n = 3). Data are expressed as means ± SEM and were analyzed by a two-tailed unpaired *t* test. \**p*<0.05; \*\**p*<0.01; \*\*\**p*<0.001; \*\*\*\**p*<0.0001.

**Supplemental Figure 2.: Comparable outcomes with lower amounts of PTCy. (A-C)** A HSCT utilizing a B6 → BALB/c donor/recipient mouse model involving a complete MHC mismatch was performed on day 0. Lethally irradiated (8.5 Gy) BALB/c mice received 5x10<sup>6</sup> TCD B6-CD45.1 BM cells and spleen cells from expanded (TL1A-Ig/IL-2; TrED group) or untreated B6-FoxP3<sup>rfp</sup> (GVHD and PTCy group) donor mice adjusted to contain 1.1x10<sup>6</sup> total T cells. Cyclophosphamide was given on day 3 and 4 post-HSCT at 50 mg/kg ip. Weights (**A**), clinical scores (**B**) and survival (**C**) are shown (GVHD: n = 5; TrED and PTCy: n = 10). Survival was analyzed by log-rank test (ns = not significant). TrED cells show advantages over PTCy treatment early post-transplant even when using lower/clinically more relevant amounts of Cy (50 mg/kg) and are comparable to 80 mg/kg in a major MHC mismatch model of pre-clinical HSCT.

**Supplemental Figure 3.: Treg assessment in blood three and four weeks post-HSCT. (A)** Percent Foxp3<sup>+</sup> Tregs out of total CD4<sup>+</sup> T cells (upper graphs) as well as Treg / CD4 ratios (lower graphs) are shown for day 21 (left) and 30 (right). Data are shown as mean ± SEM; ANOVA with Bonferroni correction was applied for multiple comparisons on day 21. Data are expressed as means ± SEM and were analyzed by a two-tailed unpaired *t* test on day 30. \**p*<0.05; \*\**p*<0.01; \*\*\**p*<0.001. Day 21: *n* = 6; day 30: GVHD: *n* = 1; PTC: *n* = 3; TrED: *n* = 4. Data shown are from two experiments for day 21 and from one experiment for day 30. **(B)** Treg engraftment over time shows a faster engraftment in TrED compared to PTCy recipients on day 30. On day 21: GVHD: *n* = 2; PTCy and TrED *n* = 3. On day 30: GVHD: *n* = 1; PTCy: *n* = 3; TrED: *n* = 4. Data are expressed as means ± SEM and were analyzed by a two-tailed unpaired *t* test. \**p*<0.05.

**Supplemental Figure 4.: Masson's trichrome staining from recipient lungs in a Minor HSCT mouse model on day 200 post-HSCT.** Representative staining (chosen from 2 independent experiments) exhibited multifocal areas of moderate chronic, active inflammation and fibrosis in the PTCy compared to the TrED group which was within normal limits. Magnification = 200x. The pathology score is shown on the right (*n* = 6-8). Data are shown as mean ± SEM; ANOVA with Bonferroni correction was applied for multiple comparisons. \**p*<0.05; \*\**p*<0.01; \*\*\**p*<0.001; \*\*\*\**p*<0.0001. Data shown are from one experiment. Scale bars: 100 μm.

**Supplemental Figure 5.: Naïve/memory compartment over time (1-3 months post-HSCT).** A HSCT utilizing a B6 → BALB/c donor/recipient mouse model involving a complete MHC mismatch was performed as described in Fig. 1. The naïve/memory compartment was analyzed by flow cytometry (CD44/CD62L) in PB at 30, 60 and 90 days post-HSCT. The naïve compartments of CD4<sup>+</sup> and CD8<sup>+</sup> cells are significantly larger in TrED recipients compared to PTCy treated animals at 1 and 2 months post HSCT. At 3 months post HSCT a significant difference is only seen in CD8<sup>+</sup> cells. GVHD: *n* = 3; PTCy and TrED: *n* = 8-10. Data are expressed as means ± SEM and were analyzed by a two-tailed unpaired *t* test. \**p*<0.05; \*\**p*<0.01; \*\*\**p*<0.001; \*\*\*\**p*<0.0001.

**Supplemental Figure 6.: Assessment of the DN CD44/CD25 subsets at 3 weeks and 1 month post allogeneic HSCT by flow cytometry.** A HSCT utilizing a B6 → BALB/c donor/recipient mouse model involving a complete MHC mismatch was performed as described in Fig. 1. **(A)** At 3 weeks post-HSCT no significant difference could be detected in DN3 (CD44<sup>+</sup>CD25<sup>+</sup>) and DN4 (CD44<sup>+</sup>CD25<sup>-</sup>) subtypes between the TrED and the PTCy group (*n* = 3-4). **(B)** However, at 1 month post HSCT there

are significant differences detectable in DN3 (CD44<sup>+</sup>CD25<sup>+</sup>) and DN4 (CD44<sup>+</sup>CD25<sup>-</sup>) subtypes between the TrED and the PTCy group (n = 6). Data are expressed as means ± SEM and were analyzed by a two-tailed unpaired *t* test. \**p*<0.05; \*\**p*<0.01.

**Supplemental Figure 7.: Assessment of recent thymic/marrow emigrants (RTEs/RMEs) at one and two months post-HSCT.** A HSCT utilizing a B6 → BALB/c donor/recipient mouse model involving a complete MHC mismatch was performed on day 0. Lethally irradiated (8.5 Gy) BALB/c mice received 5x10<sup>6</sup> TCD B6-RAG2p-GFP BM cells and spleen cells from expanded (TL1A-Ig/IL-2; TrED group) or untreated B6-FoxP3<sup>rfp</sup> (GVHD and PTCy group) donor mice adjusted to contain 1.1x10<sup>6</sup> total T cells. Cyclophosphamide was given on day 3 and 4 post-HSCT at 80 mg/kg ip. RTEs/RMEs were analyzed in PB by flow cytometry one (A) and two (B) months post-HSCT (n = 2-3). (A) One month post-HSCT no significant differences were detectable between the TrED and the PTCy group in CD4<sup>+</sup>, CD8<sup>+</sup> and CD19<sup>+</sup> cells. (B) Two months post-HSCT the only significant difference was evident in the CD8<sup>+</sup> compartment between the 2 groups. Data are expressed as means ± SEM and were analyzed by a two-tailed unpaired *t* test. \**p*<0.05; \*\**p*<0.01.

# Supplemental Figure 1: Wolf et al.

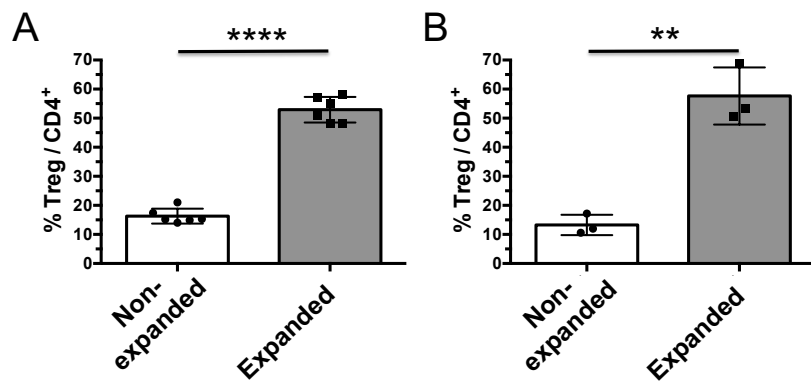

## Supplemental Figure 2: Wolf et al.

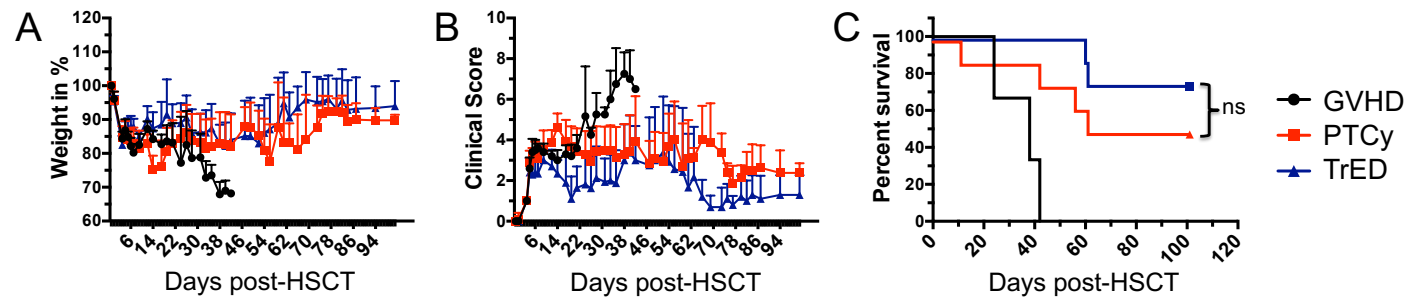

# Supplemental Figure 3: Wolf et al.

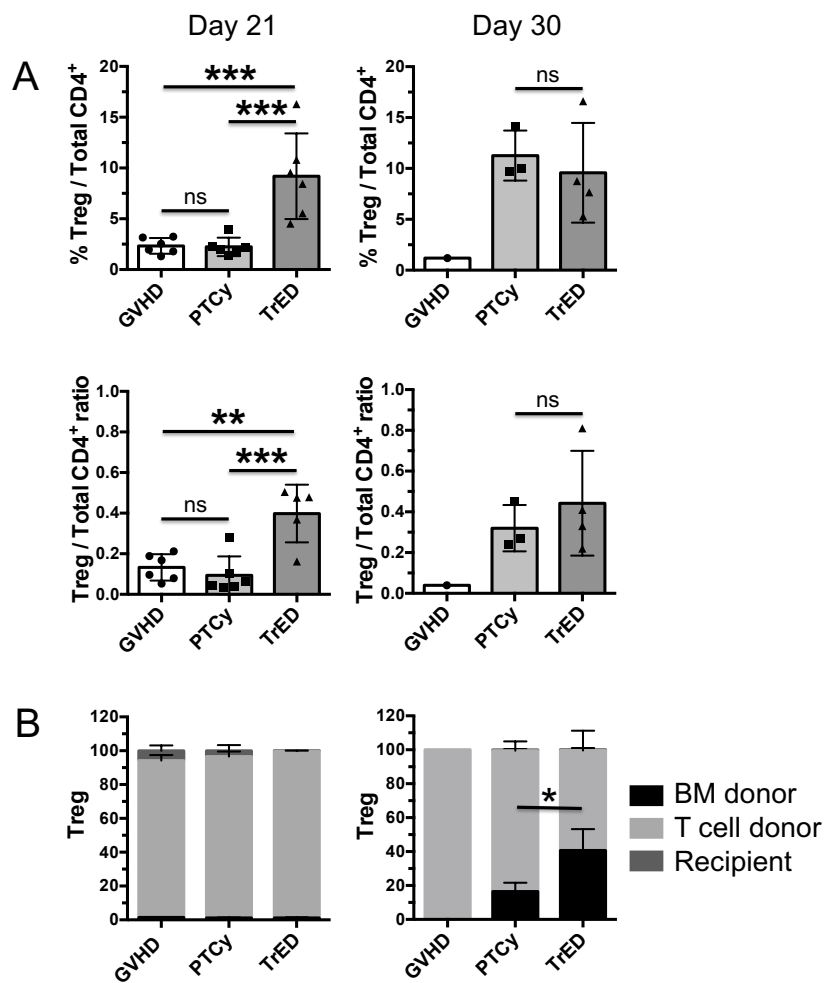

# Supplemental Figure 4: Wolf et al.

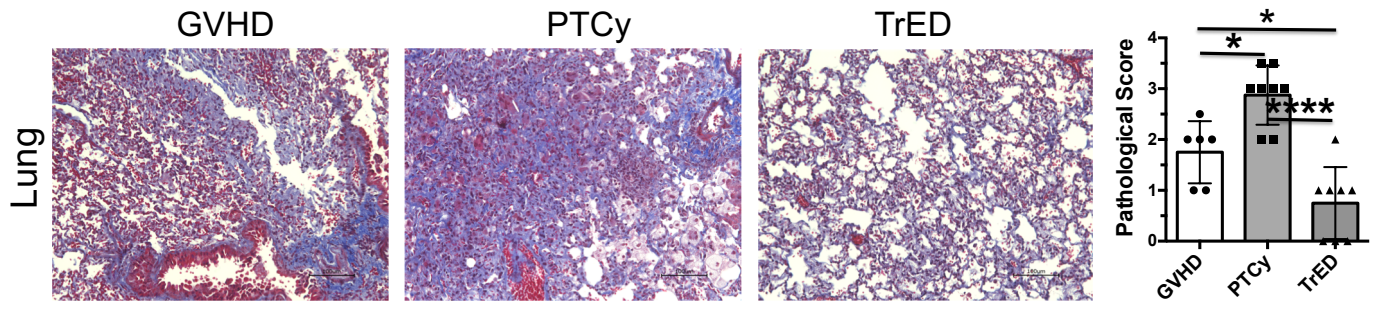

## Supplemental Figure 5: Wolf et al.

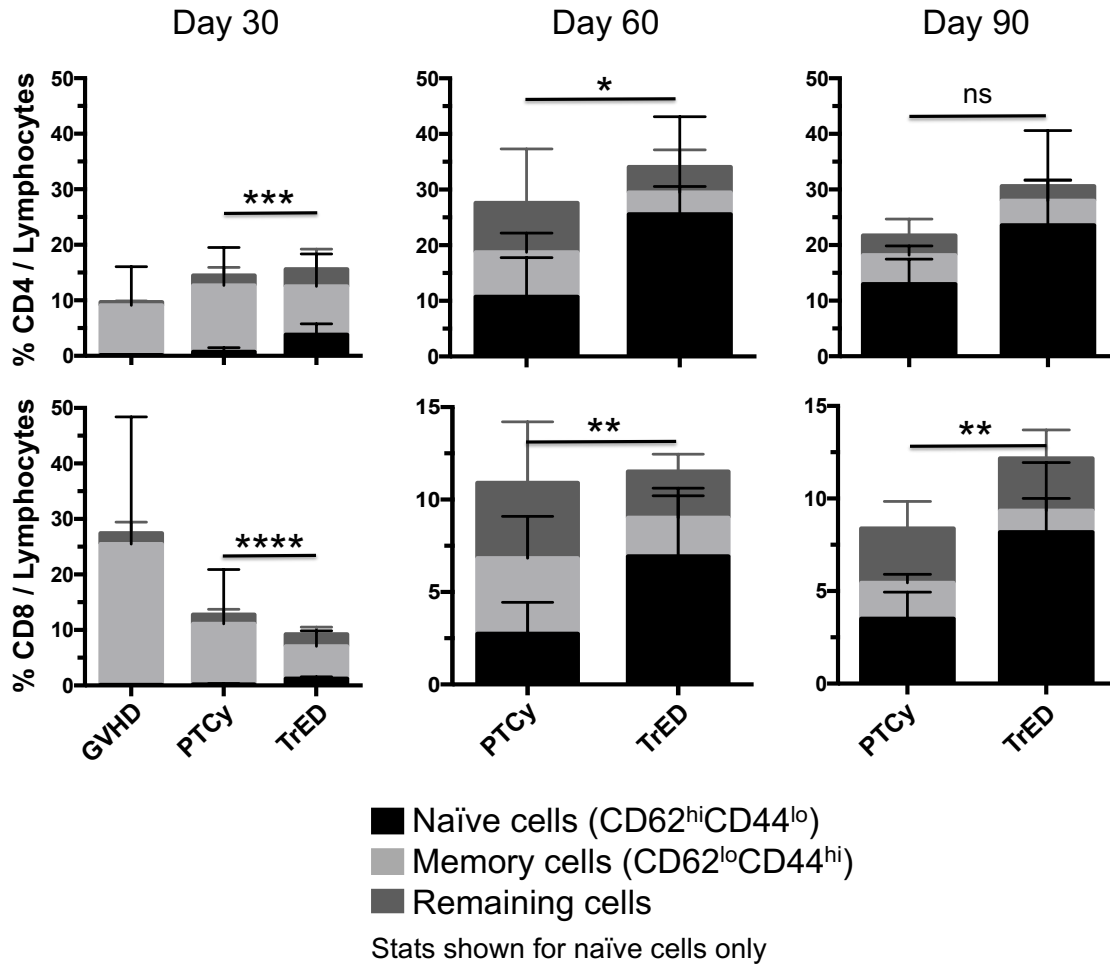



# Supplemental Figure 6: Wolf et al.

A

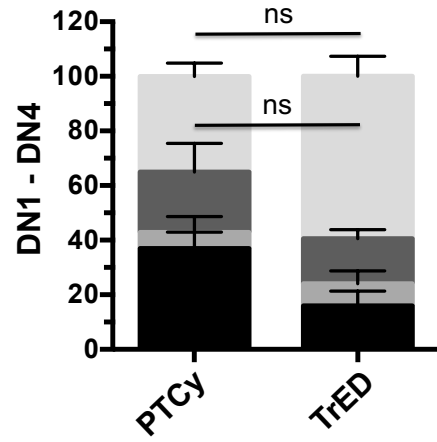

B

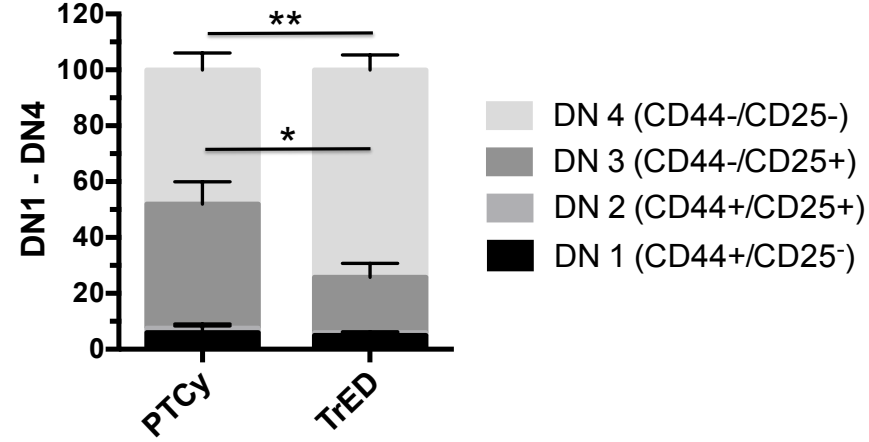

## Supplemental Figure 7: Wolf et al.

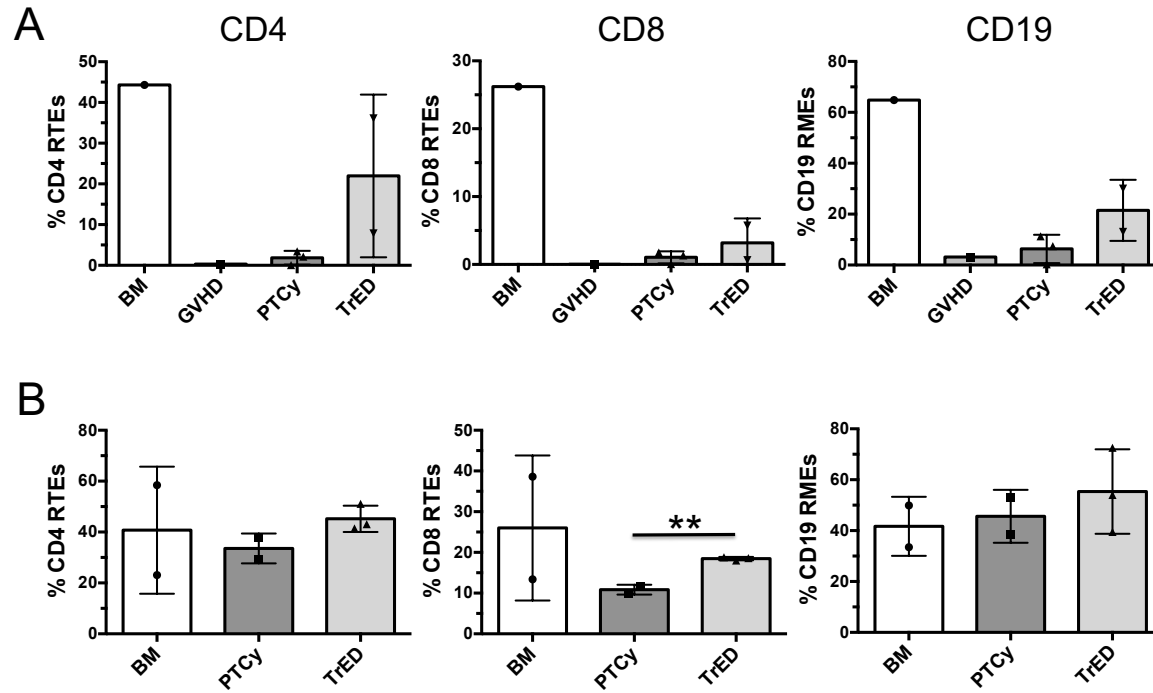

Supplement: sd1 [file 1]
